# Supplementary material for: β-Cyclodextrin trimers enclosing an unusual organization of guest: The inclusion complex β-cyclodextrin/4-pyridinealdazine
Source: Royal Society of Chemistry journal article supplement (doi:10.1039/b709155a), 2007-01-01
Supplement: b709155a.pdf [file b709155a.pdf]

A novel packing of  $\beta$ -Cyclodextrin enclosing an unusual organization of guest: The inclusion complexes  $\beta$ -Cyclodextrin/4-pyridinealdazine.

Spyros D. Chatziefthimiou, Konstantina Yannakopoulou and Irene M. Mavridis\*

Institute of Physical Chemistry, National Center for Scientific Research

“Demokritos”, Aghia Paraskevi 153 10, Athens, Greece

## **SUPPORTING INFORMATION**

\*Corresponding author's e-mail: [mavridi@chem.demokritos.gr](mailto:mavridi@chem.demokritos.gr)

**Table S1. Conformations of the macrocycle and the glucose units**

| Residue           | D <sup>a</sup><br>(Å) | φ <sup>b</sup><br>(°) | d <sup>c</sup><br>(Å) | Tilt<br>angles <sup>d</sup><br>(°) | D <sub>3</sub> <sup>e</sup><br>(Å) | Torsion Angle(°)<br>O5n-C5n-C6n-O6n |
|-------------------|-----------------------|-----------------------|-----------------------|------------------------------------|------------------------------------|-------------------------------------|
| <b>Molecule A</b> |                       |                       |                       |                                    |                                    |                                     |
| <b>G1</b>         | 4.219 (7)             | 125.0 (2)             | 0.034 (4)             | 11.9 (2)                           | 2.730 (8)                          | -54.8 (7)<br>59.8 (17)              |
| <b>G2</b>         | 4.340 (8)             | 124.6 (2)             | -0.012 (4)            | 10.3 (1)                           | 2.822 (8)                          | -60.2 (8)                           |
| <b>G3</b>         | 4.472 (8)             | 132.6 (2)             | -0.056 (4)            | 10.5 (1)                           | 2.795 (9)                          | -66.3 (10)                          |
| <b>G4</b>         | 4.287 (8)             | 132.1 (2)             | 0.057 (4)             | 8.2 (2)                            | 2.798 (9)                          | -65.4 (11)<br>60.0 (14)             |
| <b>G5</b>         | 4.222 (8)             | 121.9 (2)             | 0.021 (4)             | 7.6 (2)                            | 2.706 (8)                          | -62.9 (8)                           |
| <b>G6</b>         | 4.472 (8)             | 128.8 (2)             | -0.069 (4)            | 7.3 (2)                            | 2.767 (8)                          | -70.6 (10)<br>35.4 (14)             |
| <b>G7</b>         | 4.392 (7)             | 135.0 (2)             | 0.025 (4)             | 10.3 (2)                           | 2.783 (8)                          | 74.9 (9)                            |
| <b>Molecule B</b> |                       |                       |                       |                                    |                                    |                                     |
| <b>G1</b>         | 4.242 (8)             | 130.4 (1)             | 0.083 (3)             | 9.8 (2)                            | 2.690 (7)                          | -60.7 (7)                           |
| <b>G2</b>         | 4.332 (7)             | 122.4 (1)             | -0.037 (3)            | 14.8 (2)                           | 2.793 (8)                          | -57.5 (8)                           |
| <b>G3</b>         | 4.362 (7)             | 131.7 (2)             | -0.057 (3)            | 6.7 (1)                            | 2.855 (8)                          | -62. (7)                            |
| <b>G4</b>         | 4.378 (7)             | 129.5 (2)             | 0.042 (3)             | 11.6 (2)                           | 2.786 (7)                          | -65.6 (7)                           |
| <b>G5</b>         | 4.360 (7)             | 129.6 (1)             | 0.057 (3)             | 10.3 (2)                           | 2.774 (7)                          | 73.1 (9)<br>-60.0 (1)               |
| <b>G6</b>         | 4.195 (7)             | 122.6 (2)             | -0.088 (3)            | 14.4 (2)                           | 2.813 (8)                          | 61.4 (8)                            |
| <b>G7</b>         | 4.580 (7)             | 133.5 (2)             | -0.001 (3)            | 7.0 (2)                            | 2.856 (8)                          | -62.6 (7)                           |
| <b>Molecule C</b> |                       |                       |                       |                                    |                                    |                                     |
| <b>G1</b>         | 4.166 (8)             | 123.5 (2)             | 0.159 (3)             | 11.7 (2)                           | 2.690 (9)                          | -62.0 (7)                           |
| <b>G2</b>         | 4.452 (8)             | 129.4 (2)             | -0.018 (4)            | 16.8 (2)                           | 2.805 (7)                          | 65.3 (8)                            |
| <b>G3</b>         | 4.318 (7)             | 129.5 (2)             | -0.132 (4)            | 5.6 (1)                            | 2.815 (8)                          | -56.4 (8)                           |
| <b>G4</b>         | 4.374 (7)             | 129.9 (2)             | 0.035 (4)             | 13.1 (2)                           | 2.762 (8)                          | -64.7 (8)                           |
| <b>G5</b>         | 4.200 (8)             | 124.3 (2)             | 0.178 (4)             | 8.1 (2)                            | 2.704 (7)                          | 77.8 (9)                            |
| <b>G6</b>         | 4.382 (8)             | 129.8 (2)             | -0.174 (4)            | 17.1 (3)                           | 2.751 (8)                          | 71.8 (9)                            |
| <b>G7</b>         | 4.411 (7)             | 132.6 (2)             | -0.048 (4)            | 7.2 (1)                            | 2.831 (10)                         | -63.1 (8)                           |

<sup>a</sup>O4n...O4(n+1) distances; <sup>b</sup>O4(n-1)...O4n...O4(n+1) angles; <sup>c</sup>Deviations (Å) from the least-squares optimum plane of the seven O4n atoms; <sup>d</sup>Tilt angles between the optimum O4n plane and the mean planes through atoms O4(n-1), C1n, C4n, O4n (with esds in parentheses). <sup>e</sup>Intramolecular hydrogen-bond distances between atoms O2n...O3(n-1)

**Table S2. Ring Puckering Analysis** (Cremer, D.; Pople J. A. *J. Am. Chem. Soc.* **1975**, *97*, 1354-1358; e.s.d. following Norrestam, *Acta Crystallog.* **1981**, *A37*, 764-765)

| Residue           | Q        | $\Theta$ | $\varphi$ |
|-------------------|----------|----------|-----------|
| <b>Molecule A</b> |          |          |           |
| G1                | 0.575(8) | 5.8(8)   | 151(8)    |
| G2                | 0.563(8) | 4.2(8)   | 88(9)     |
| G3                | 0.567(8) | 0.6(8)   | 343(18)   |
| G4                | 0.572(9) | 6.0(8)   | 191(8)    |
| G5                | 0.560(8) | 3.3(8)   | 116(13)   |
| G6                | 0.559(8) | 5.1(9)   | 80(8)     |
| G7                | 0.586(8) | 5.5(8)   | 255(8)    |
| <b>Molecule B</b> |          |          |           |
| G1                | 0.579(8) | 8.1(8)   | 242(5)    |
| G2                | 0.570(8) | 2.1(8)   | 76(23)    |
| G3                | 0.591(8) | 3.5(7)   | 164(12)   |
| G4                | 0.563(8) | 2.6(8)   | 130(16)   |
| G5                | 0.557(8) | 3.3(7)   | 171(13)   |
| G6                | 0.554(7) | 1.9(7)   | 20(26)    |
| G7                | 0.564(8) | 6.3(8)   | 106(7)    |
| <b>Molecule C</b> |          |          |           |
| G1                | 0.579(8) | 4.6(8)   | 241(10)   |
| G2                | 0.540(8) | 7.3(8)   | 59(6)     |
| G3                | 0.564(8) | 4.4(7)   | 331(9)    |
| G4                | 0.547(8) | 3.9(7)   | 330(11)   |
| G5                | 0.558(8) | 2.3(8)   | 310(25)   |
| G6                | 0.564(8) | 5.9(9)   | 76(9)     |
| G7                | 0.553(8) | 2.7(8)   | 325(17)   |

**Table S3. Intermolecular hydrogen bonds between macrocycles**

| a. Between hosts A ... B (dimer) |                |                                  |                                  |                    |
|----------------------------------|----------------|----------------------------------|----------------------------------|--------------------|
| $O_a \dots O_b$                  | Distance (Å)   | $C_a-O_a \dots O_b$ ( $^\circ$ ) | $O_a \dots O_b-C_b$ ( $^\circ$ ) | Symmetry Operation |
| O31A - O37B                      | 2.704 (0.0074) | 117.6 (4)                        | 115.9 (4)                        | Along the channel  |
| O32A - O36B                      | 2.777 (0.0073) | 118.6 (4)                        | 115.8 (4)                        | Along the channel  |
| O33A - O35B                      | 2.766 (0.0070) | 113.0 (4)                        | 119.6 (4)                        | Along the channel  |
| O34A - O34B                      | 2.787 (0.0074) | 121.3 (5)                        | 110.3 (4)                        | Along the channel  |

|                                                                            |                     |                                                        |                                                        |                           |
|----------------------------------------------------------------------------|---------------------|--------------------------------------------------------|--------------------------------------------------------|---------------------------|
| O35A - O33B                                                                | 2.696 (0.0071)      | 113.3 (4)                                              | 119.9 (4)                                              | Along the channel         |
| O36A - O32B                                                                | 2.863 (0.0076)      | 123.0 (5)                                              | 113.4 (4)                                              | Along the channel         |
| O37A - O31B                                                                | 2.808 (0.0075)      | 115.5 (5)                                              | 116.5 (4)                                              | Along the channel         |
| b. Between hosts A ... C                                                   |                     |                                                        |                                                        |                           |
| <b>O<sub>a</sub>...O<sub>c</sub></b>                                       | <b>Distance (Å)</b> | <b>C<sub>a</sub>-O<sub>a</sub>...O<sub>c</sub> (°)</b> | <b>O<sub>c</sub>...O<sub>a</sub>-C<sub>a</sub> (°)</b> | <b>Symmetry Operation</b> |
| O61A <sub>b</sub> - O31C                                                   | 2.690 (32)          | 115.9 (17)                                             | 111.8 (8)                                              | Intra-trimer              |
| O63A - O33C                                                                | 2.668 (8)           | 98.1 (6)                                               | 133.5 (5)                                              | Along the channel         |
| O64A <sub>a</sub> - O34C                                                   | 2.866 (9)           | 109.3 (7)                                              | 122.5 (4)                                              | Along the channel         |
| O64A <sub>b</sub> - O24C                                                   | 3.007 (20)          | 116.7 (12)                                             | 113.8 (6)                                              | Along the channel         |
| O66A <sub>b</sub> - O36C                                                   | 2.780 (25)          | 122.4 (14)                                             | 111.7 (7)                                              | Along the channel         |
| O65A - O35C                                                                | 3.189 (8)           | 83.8 (4)                                               | 137.5 (4)                                              | Along the channel         |
| O67A - O37C                                                                | 2.741 (10)          | 95.4 (6)                                               | 114.7 (5)                                              | Along the channel         |
| c. Between hosts C ... B                                                   |                     |                                                        |                                                        |                           |
| <b>O<sub>c</sub>...O<sub>b</sub></b>                                       | <b>Distance (Å)</b> | <b>C<sub>c</sub>-O<sub>c</sub>...O<sub>b</sub> (°)</b> | <b>O<sub>b</sub>...O<sub>c</sub>-C<sub>c</sub> (°)</b> | <b>Symmetry Operation</b> |
| O62C - O66B                                                                | 2.791 (9)           | 134.8 (6)                                              | 89.7 (4)                                               | x, y, z+1                 |
| O64C - O64B                                                                | 2.751 (7)           | 103.6 (4)                                              | 100.2 (4)                                              | x, y, z+1                 |
| Intermolecular hydrogen bonds of the hosts (A, B, and C) among the columns |                     |                                                        |                                                        |                           |
| <b>O<sub>a</sub>...O<sub>b</sub></b>                                       | <b>Distance (Å)</b> | <b>C<sub>a</sub>-O<sub>a</sub>...O<sub>b</sub> (°)</b> | <b>O<sub>a</sub>...O<sub>b</sub>-C<sub>b</sub> (°)</b> | <b>Symmetry Operation</b> |
| O61A <sub>a</sub> - O25C <sub>z</sub>                                      | 2.592 (9)           | 129.4 (5)                                              | 99.3 (4)                                               | x, y+1, z                 |
| O61A <sub>a</sub> - O65A                                                   | 2.973 (10)          | 135.1 (5)                                              | 118.5 (5)                                              | x, y+1, +z                |
| O25A - O27B                                                                | 2.700 (8)           | 107.1 (4)                                              | 109.6 (4)                                              | x, y-1, +z                |
| O63B - O67B                                                                | 2.854 (7)           | 127.9 (4)                                              | 110.1 (4)                                              | x, y-1, +z                |
| O27A - O25B                                                                | 2.715 (8)           | 93.8 (4)                                               | 120.3 (4)                                              | x-1, y, +z                |
| O61C - O63B                                                                | 2.633 (7)           | 108.1 (4)                                              | 107.1 (4)                                              | x, y+1, z+1               |
| O63C - O61B                                                                | 2.702 (8)           | 105.3 (4)                                              | 108.5 (4)                                              | x+1, y, z+1               |
| O54C - O61B                                                                | 3.187 (8)           | 133.7 (4)                                              | 143.4 (5)                                              | x+1, y, z+1               |
| O61B - O63C                                                                | 2.702 (8)           | 108.5 (4)                                              | 105.3 (4)                                              | x-1, y, z-1               |
| O51B - O63C                                                                | 3.176 (7)           | 112.6 (4)                                              | 1295 (4)                                               | x-1, y, z-1               |
| O63B - O51C                                                                | 3.001 (7)           | 128.2 (4)                                              | 112.9 (4)                                              | x, y-1, +z-1              |
| O54B - O61C                                                                | 3.100 (8)           | 112.9 (4)                                              | 150.6 (4)                                              | x, y-1, z-1               |

**Table S4.** Selected H-bonds distances in the guest-water assembly (a and b refer to molecules of major and minor occupancies, respectively).

| <b>Guest<sub>a</sub> - O<sub>water</sub></b> | <b>Distance</b> | <b>Guest<sub>b</sub> - O<sub>water</sub></b> | <b>Distance</b> |
|----------------------------------------------|-----------------|----------------------------------------------|-----------------|
| N1_1a - O20                                  | 2.74 (1)        | N1_1b - O20                                  | 2.97 (2)        |
| N1_2a - O29                                  | 2.88 (1)        | N1_2b - O29                                  | 2.87 (3)        |
| N4_1a - O33                                  | 2.94 (2)        | N4_1b - O33                                  | 2.95 (2)        |
| N4_1a - O36_a                                | 3.53 (3)        | N4_1b - O36_a                                | 2.93 (2)        |
| N4_2a - O36_a                                | 3.37 (3)        | N4_2b - O36_a                                | 2.74 (4)        |
| N4_2a - O36_b                                | 3.03 (2)        | N4_2b - O36_b                                | 2.98 (4)        |
| N4_2a - O35                                  | 2.68 (2)        | N4_2b - O35                                  | 3.04 (4)        |
| <b>O<sub>water</sub> - O<sub>water</sub></b> | <b>Distance</b> | <b>O<sub>water</sub> - O<sub>water</sub></b> | <b>Distance</b> |
| O16 - O20                                    | 2.77 (1)        | O24 - O27_a                                  | 2.77 (3)        |
| O16 - O22_a                                  | 2.69(1)         | O27_a - O35                                  | 2.66 (2)        |
| O16 - O22_b                                  | 2.91(1)         | O33 - O35                                    | 2.55 (2)        |
| O19 - O29                                    | 2.70 (1)        | O33 - O36_b                                  | 2.83 (4)        |
| O20 - O24                                    | 2.78 (1)        | O33 - O36_a                                  | 2.19 (3)        |
| O20 - O29                                    | 2.73 (1)        | O33 - O41_b                                  | 2.70 (4)        |
| O22_a - O36_a                                | 2.622 (2)       | O33 - O41_a                                  | 2.86 (5)        |
| O22_b - O36_b                                | 2.14 (5)        | O35 - O41_a                                  | 2.86 (5)        |

**Table S5.** H-Bonds between water molecules and CD macrocycles

| <b>O<sub>cd</sub>...O<sub>water</sub></b> | <b>Distance (Å)</b> | <b>C<sub>cd</sub>-O<sub>cd</sub>...O<sub>water</sub> (°)</b> | <b>Symmetry Operation</b> |
|-------------------------------------------|---------------------|--------------------------------------------------------------|---------------------------|
| O21A-O42                                  | 2.412 (38)          | 103.0 (9)                                                    | x, y-1, z                 |
| O61A_a-O13                                | 2.703 (9)           | 104.9 (5)                                                    |                           |
| O32A-O34_a                                | 2.818 (18)          | 124.2 (7)                                                    | x-1, y-1, z               |
| O62A-O39_a                                | 2.739 (21)          | 141.0 (6)                                                    |                           |
| O62A-O3                                   | 2.755 (9)           | 111.4 (5)                                                    |                           |
| O62A-O15                                  | 2.718 (9)           | 117.0 (6)                                                    |                           |
| O23A-O25                                  | 2.690 (11)          | 103.4 (5)                                                    |                           |
| O63A-O31                                  | 2.452 (15)          | 130.8 (8)                                                    |                           |
| O63A-O32                                  | 2.866 (23)          | 131.2 (7)                                                    | x-1, y, z                 |
| O34A-O30_b                                | 2.829 (39)          | 117.0 (10)                                                   | x, y+1, z                 |
| O34A-O30_a                                | 3.000 (15)          | 137.4 (6)                                                    | x, y+1, z                 |
| O54A-O37_a                                | 2.846 (16)          | 104.0 (5)                                                    | x, y+1, z                 |
| O64A_a-O37_a                              | 2.884 (15)          | 107.5 (5)                                                    |                           |
| O35A-O42                                  | 2.822 (37)          | 111.8 (8)                                                    |                           |
| O65A-O28_a                                | 2.729 (15)          | 114.5 (6)                                                    | x+1, y+1, z               |
| O65A-O28_b                                | 2.682 (26)          | 128.7 (8)                                                    | x+1, y+1, z               |
| O26A-O9_b                                 | 2.742 (40)          | 124.3 (9)                                                    | x+1, y+1, z               |
| O36A-O23_b                                | 2.862 (19)          | 131.9 (6)                                                    |                           |
| O66A_a-O37_a                              | 3.078 (15)          | 126.9 (6)                                                    |                           |
| O66A_b-O38_a                              | 3.058 (15)          | 107.1 (7)                                                    |                           |
| O66A_a-O40                                | 3.038 (28)          | 137.5 (12)                                                   |                           |
| O57A-O32                                  | 2.885 (15)          | 118.9 (5)                                                    |                           |
| O21B-O26                                  | 2.597 (10)          | 115.7 (5)                                                    | x+1, y, z                 |
| O61B-O7                                   | 2.780 (8)           | 99.5 (5)                                                     | x+1, y, z+1               |

|              |                |            |               |
|--------------|----------------|------------|---------------|
| O22B-O23_a   | 2.650 (10)     | 109.5 (5)  |               |
| O32B-O5      | 2.953 (8)      | 117.4 (4)  | x+1, y+1, z+1 |
| O52B-O7      | 2.808 (7)      | 124.7 (4)  | x+1, y, z+1   |
| O62B-O8      | 2.668 (9)      | 111.0 (5)  | x+1, y+1, z+1 |
| O62B-O2      | 2.782 (8)      | 109.3 (4)  | x+1, y+1, z+1 |
| O23B-O17     | 2.699 (9)      | 104.7 (5)  | x+1, y+1, z+1 |
| O24B-O30_a   | 2.728 (13)     | 103.6 (5)  | x, y+1, z     |
| O34B-O23_b   | 2.915 (19)     | 111.2 (6)  | x-1, y, z     |
| O34B-O23_a   | 2.734 (11)     | 107.0 (5)  | x-1, y, z     |
| O64B-O4      | 2.765 (8)      | 118.0 (4)  | x, y+1, z+1   |
| O35B-O26     | 2.784 (9)      | 109.8 (4)  |               |
| O65B_b-O14   | 2.806 (21)     | 126.1 (12) | x, y, z-1     |
| O65B_a-O41_b | 2.841 (13)     | 103.2 (5)  |               |
| O65B_a-O41_a | 2.614 (14)     | 133.9 (5)  |               |
| O26B-O9_a    | 2.682 (10)     | 102.2 (4)  |               |
| O36B-O30_a   | 2.744 (12)     | 127.6 (5)  |               |
| O66B-O22_b   | 2.779 (38)     | 123.7 (10) | x, y, z+1     |
| O66B-O22_a   | 2.814 (11)     | 107.2 (5)  | x, y, z+1     |
| O66B-O24     | 2.859 (11)     | 111.4 (4)  |               |
| O37B-O17     | 2.959 (9)      | 115.6 (4)  | x+1, y, z+1   |
| O67B-O6      | 2.725 (7)      | 118.8 (4)  | x+1, y, z+1   |
| O21C-O13     | 2.674 (0.0083) | 121.3 (4)  |               |
| O61C-O4      | 2.755 (8)      | 100.4 (4)  |               |
| O22C-O3      | 2.710 (7)      | 110.9 (4)  |               |
| O32C-O2      | 2.821 (8)      | 111.5 (4)  |               |
| O52C-O4      | 2.837 (8)      | 129.7 (4)  |               |
| O62C-O5      | 2.988 (9)      | 100.2 (5)  |               |
| O23C-O18     | 2.659 (9)      | 104.0 (5)  |               |
| O53C-O6      | 3.282 (8)      | 110.0 (4)  |               |
| O63C-O6      | 2.847 (8)      | 100.1 (5)  |               |
| O24C-O37_b   | 2.581 (25)     | 100.2 (7)  | x, y+1, z     |
| O24C-O37_a   | 2.769 (17)     | 135.0 (8)  | x, y+1, z     |
| O34C-O3      | 2.821 (8)      | 110.5 (4)  | x, y+1, z     |
| O54C-O7      | 2.925 (8)      | 113.7 (4)  |               |
| O64C-O7      | 2.706 (7)      | 117.3 (4)  |               |
| O35C-O13     | 2.703 (9)      | 112.4 (4)  | x, y+1, z     |
| O65C-O19     | 2.743 (10)     | 99.2 (5)   | x, y, z-1     |
| O65C-O27_a   | 2.684 (13)     | 104.2 (6)  |               |
| O26C-O38_a   | 2.944 (17)     | 117.8 (7)  | x+1, y+1, z   |
| O26C-O15     | 2.701 (8)      | 108.7 (4)  | 1+x, 1+y, z   |
| O36C-O38_a   | 3.138 (28)     | 115.5 (6)  | x+1, y+1, z   |
| O36C-O39_a   | 2.864 (21)     | 128.1 (7)  | x+1, y+1, z   |
| O66C-O16     | 2.654 (10)     | 109.4 (6)  | x, y, z-1     |
| O66C-O19     | 2.706 (10)     | 139.9 (6)  | x, y, z-1     |
| O66C-O27_a   | 2.992 (14)     | 122.3 (5)  |               |

**Table S6. Crystallographic data**

|                   |                         |
|-------------------|-------------------------|
| Empirical formula | C150 H165.28 N8 O142.05 |
| Formula weight    | 4352.98                 |

|                                                           |                                             |
|-----------------------------------------------------------|---------------------------------------------|
| Temperature                                               | 100(2) K                                    |
| Wavelength                                                | 0.80150 Å                                   |
| Crystal system, space group                               | Triclinic, P 1                              |
| Unit cell dimensions                                      | a = 15.067(10) Å, alpha = 101.02(6) deg.    |
|                                                           | b = 15.478(7) Å, beta = 99.84(8) deg        |
|                                                           | c = 23.36(2) Å, gamma = 105.10(4) deg.      |
| Volume                                                    | 5021(26) Å <sup>3</sup>                     |
| Z, Calculated density                                     | 1, 1.440 g/cm <sup>3</sup>                  |
| Absorption coefficient                                    | 0.131 mm <sup>-1</sup>                      |
| F(000)                                                    | 2258                                        |
| Crystal size                                              | 0.4 x 0.4 x 0.3 mm                          |
| Theta range for data collection                           | 1.59 to 27.43 deg                           |
| Limiting indices                                          | 0 ≤ h ≤ 17, -17 ≤ k ≤ 17, -26 ≤ l ≤ 26      |
| Reflections collected / unique                            | 14599 / 14599 [R(int) = 0.0000]             |
| Completeness to theta = 27.43                             | 91.5 %                                      |
| Refinement method                                         | Full-matrix least-squares on F <sup>2</sup> |
| All data / data [Fo > 4sig(Fo)] / restraints / parameters | 14599 / 13814 / 363 / 2791                  |
| Goodness-of-fit on F <sup>2</sup>                         | 1.037                                       |
| Final R indices [Fo > 4sig(Fo)]                           | R1 = 0.0653, wR2 = 0.1772                   |
| R indices (all data)                                      | R1 = 0.0681, wR2 = 0.1804                   |
| Absolute structure parameter                              | 0.6(9)                                      |
| Largest diff. peak and hole                               | 0.560 and -0.427 e.Å <sup>-3</sup>          |

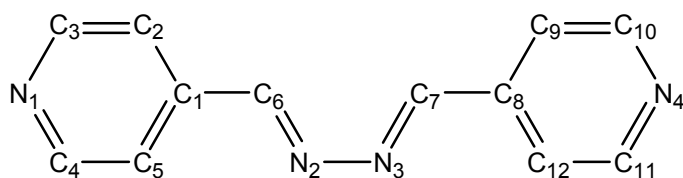

Scheme 1. Numbering scheme of 4-pyridinealdazine. Major occupancy guests **1a** and **2a**. Minor occupancy guests **1b** and **2b**.

**Table S7. Structural characteristics of the guest dimers.**

| Major occupancy guests <b>1a</b> and <b>2a</b> .<br>Minor occupancy guests <b>1b</b> and <b>2b</b> .                                      | <b>1a – 2a</b> | <b>1b - 2b</b> |
|-------------------------------------------------------------------------------------------------------------------------------------------|----------------|----------------|
| Angle between the two guest molecules                                                                                                     | 16.8° (4)      | 6.4° (6)       |
| Angle between the rings (C <sub>1</sub> -C <sub>2</sub> -N <sub>1</sub> -C <sub>3</sub> -C <sub>4</sub> -C <sub>5</sub> ) of the dimer    | 14.7° (3)      | 13.8° (6)      |
| Angle between the rings (C <sub>8</sub> -C <sub>9</sub> -N <sub>4</sub> -C <sub>10</sub> -C <sub>11</sub> -C <sub>12</sub> ) of the dimer | 18.0° (5)      | 2.6° (6)       |

|                                                                                                                                                              |                           |                           |
|--------------------------------------------------------------------------------------------------------------------------------------------------------------|---------------------------|---------------------------|
| Smallest $\pi\dots\pi$ distance                                                                                                                              | 3.233 (8) Å (C9_1 – C8_2) | 3.286 (7) Å (C5_1 – C2_2) |
| Distances between the centers of the (C <sub>1</sub> -C <sub>2</sub> -N <sub>1</sub> -C <sub>3</sub> -C <sub>4</sub> -C <sub>5</sub> ) rings of the dimer    | 3.726 (11)Å               | 3.600 (11)Å               |
| Distances between the centers of the (C <sub>8</sub> -C <sub>9</sub> -N <sub>4</sub> -C <sub>10</sub> -C <sub>11</sub> -C <sub>12</sub> ) rings of the dimer | 3.726 (11)Å               | 3.453 (10)Å               |

**Table S8. Intermolecular interactions between  $\beta$ CD and guest dimers**

| CD molecule | Guest molecule | Distance (Å) |
|-------------|----------------|--------------|
| O61A_a      | C8_1a          | 3.55 (1)     |
| O61A_b      | C9_1a          | 3.23 (1)     |
| C51A        | C7_1a          | 3.59 (2)     |
| C36A        | C2_2a          | 3.48 (1)     |
| O67A        | C7_2a          | 3.40 (2)     |
| O44A        | N2_2b          | 3.66 (3)     |
| O45A        | N2_2a          | 3.52 (1)     |
| C36B        | C4_1a          | 3.65 (2)     |
| C37B        | N1_1a          | 3.80 (2)     |
| C37B        | C4_1b          | 3.60 (3)     |
| O46B        | N1_1a          | 3.70 (1)     |
| O46B        | N1_1b          | 3.81 (2)     |
| C31C        | N4_1b          | 3.58 (2)     |
| O41C        | N4_1a          | 3.82 (2)     |
| O41C        | N4_1b          | 3.79 (2)     |
| O45C        | N4_2a          | 3.89 (2)     |
| O45C        | N4_2b          | 3.85 (4)     |
| O27C        | C9_2a          | 3.69 (1)     |
